# Supplementary material
Source: PubMed Central journal article supplement (PMC4494662)
Supplement: NIHMS671045-supplement-supplement_1.pdf [file NIHMS671045-supplement-supplement_1.pdf]

## SUPPLEMENTARY ONLINE DATA

# Foxk1 recruits the Sds3 complex and represses gene expression in myogenic progenitors

Xiaozhong SHI\*, David C. SELDIN† and Daniel J. GARRY\*<sup>1</sup>

\*Lillehei Heart Institute, University of Minnesota-Twin Cities, Minneapolis, MN 55455, U.S.A., and †Department of Medicine, Boston University School of Medicine, Boston, MA 02118, U.S.A.

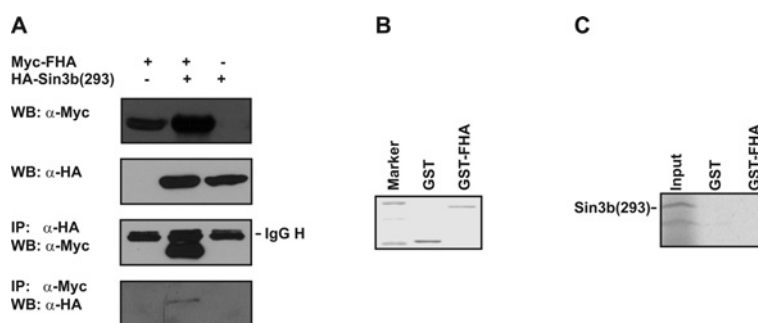

**Figure S1 Sin3b(293) binds to the Foxk1 FHA domain indirectly**

(A) The interaction between the Foxk1 FHA domain and the Sin3 repression complex was verified using the co-IP assay in C2C12 cells. Note that the Foxk1 FHA domain is co-immunoprecipitated with Sin3b(293) and the reverse is also true, and is also co-immunoprecipitated with the Foxk1 FHA domain in C2C12 cells. IP, immunoprecipitation; WB, Western blot. (B) Purified GST or GST-FHA proteins were analysed using SDS/PAGE and stained with Coomassie Blue. (C) A GST pull-down assay reveals that Sin3b(293) does not directly interact with the Foxk1 FHA domain.

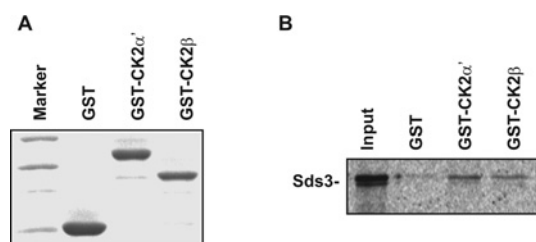

**Figure S2 CK2 $\alpha'$  and CK2 $\beta$  interact with their substrate Sds3**

(A) Coomassie Blue staining of purified GST, GST-CK2 $\alpha'$  and CK2 $\beta$  proteins used in the GST pull-down assays. (B) CK2 $\alpha'$  and CK2 $\beta$  can bind to Sds3 directly in a GST pull-down assay.

Received 3 April 2012/11 June 2012; accepted 20 June 2012  
Published as BJ Immediate Publication 20 June 2012, doi:10.1042/BJ20120563

<sup>1</sup> To whom correspondence should be addressed (email garry@umn.edu).
